# The *gyrB* gene is a useful phylogenetic marker for exploring the diversity of *Flavobacterium* strains isolated from terrestrial and aquatic habitats in Antarctica

Karolien Peeters & Anne Willems

Laboratory of Microbiology, Department of Biochemistry and Microbiology, Faculty of Science, Ghent University, Ghent, Belgium

**Correspondence:** Anne Willems, Laboratory of Microbiology, Department of Biochemistry and Microbiology, Faculty of Science, Ghent University, K.L. Ledeganckstraat 35, B-9000 Ghent, Belgium. Tel.: +32 9 264 5103; fax: +32 9 264 5092; e-mail: anne.willems@ugent.be

Received 25 March 2011; revised 9 May 2011; accepted 24 May 2011.  
Final version published online 27 June 2011.

DOI:10.1111/j.1574-6968.2011.02326.x

Editor: Aharon Oren

## Keywords

*gyrB* gene; 16S rRNA gene; *Flavobacterium*; molecular marker; diversity.

## Introduction

Heterotrophic bacterial communities in Antarctica are highly diverse in aquatic (Bowman *et al.*, 2000; Van Trappen *et al.*, 2002) as well as in terrestrial (Aislabie *et al.*, 2006; Babalola *et al.*, 2009) habitats. A genus that has been isolated often from these environments is *Flavobacterium* (Brambilla *et al.*, 2001; Humphry *et al.*, 2001; Van Trappen *et al.*, 2002), and several novel *Flavobacterium* species were described from Antarctic habitats (*Flavobacterium gelidilacus*, *Flavobacterium gillisiae*, *Flavobacterium hibernum*, *Flavobacterium micromati*, *Flavobacterium psychrolimnae*, *Flavobacterium xanthum*) or other cold environments (*Flavobacterium xinjangense* and *Flavobacterium omnivorum*). Other *Flavobacterium* species have been mainly isolated from freshwater fish (*Flavobacterium branchiophilum*, *Flavobacterium columnare*, *Flavobacterium psychrophilum*), temperate freshwater (*Flavobacterium aquatile*, *Flavobacterium flevense*, *Flavobacterium saccharophilum*) and from soil (*Flavobacterium johnsoniae*, *Flavobacterium pectinovorum*). Most *Flavobacterium* species are psychrotolerant and as they are able to hydrolyse several carbohydrates and biomacromolecules

## Abstract

Within the phylum *Bacteroidetes*, the *gyrB* gene, encoding for the B subunit of the DNA gyrase, has been used as a phylogenetic marker for several genera closely related to *Flavobacterium*. The phylogenies of the complete 16S rRNA gene and the *gyrB* gene were compared for 33 Antarctic *Flavobacterium* isolates and 23 type strains from closely related *Flavobacterium* species. *gyrB* gene sequences provided a higher discriminatory power to distinguish between different *Flavobacterium* groups than 16S rRNA gene sequences. The *gyrB* gene is therefore a promising molecular marker for elucidating the phylogenetic relationships among *Flavobacterium* species and should be evaluated for all the other type strains of described *Flavobacterium* species. Combining the phylogeny of both genes, the new Antarctic *Flavobacterium* strains constitute 15 *Flavobacterium* groups, including at least 13 potentially new species together with one group of isolates probably belonging to the species *Flavobacterium micromati* and one group close to *Flavobacterium gelidilacus*.

such as gelatine, casein and starch, they might be of biotechnological importance (Bernardet & Bowman, 2006).

The family *Flavobacteriaceae* (phylum *Bacteroidetes*) as well as the genus *Flavobacterium* have been revised and added to repeatedly over the years (Vandamme *et al.*, 1994; Bernardet *et al.*, 1996, 2002). *Flavobacterium* was created in 1923 for all bacteria that formed yellow- or orange-pigmented colonies and weakly produced acid from carbohydrates (Bergey *et al.*, 1923). This broadly defined and taxonomically heterogeneous group was further refined using phenotypic characteristics (Holmes *et al.*, 1984) and the determination of guanine plus cytosine (G+C) content (Reichenbach, 1989). The introduction of the 16S rRNA gene oligonucleotide catalogue (Paster *et al.*, 1985), DNA-rRNA hybridization data (Bauwens & De Ley, 1981; Segers *et al.*, 1993; Vandamme *et al.*, 1994) and sequence data (Woese *et al.*, 1990; Gherna & Woese, 1992) changed the family and the genus further and provided the framework for the present classification. Currently, strains are assigned to the genus *Flavobacterium* (including 71 species to date) based on fatty acid analysis, the G+C content and a number of

morphological and phenotypical characteristics following the proposal of Bernardet *et al.* (1996) in combination with 16S rRNA gene sequence analysis (Bernardet *et al.*, 2002; Bernardet & Bowman, 2006).

Although DNA–DNA hybridizations (DDH) are the gold standard for species identification (Stackebrandt *et al.*, 2002), these experiments are technically challenging, laborious and time consuming. Sequence analysis of 16S rRNA genes is used for prokaryotic classification (Rossello-Mora & Amann, 2001) to provide a tentative identification. It can often limit the number of DDH experiments required. Nevertheless, the 16S rRNA gene has a limited resolving power at the species level (Fox *et al.*, 1992; Probst *et al.*, 1998). Within the genus *Flavobacterium*, values of 97.2–98.7% 16S rRNA gene sequence similarity are found between distinct *Flavobacterium* species (Bernardet & Bowman, 2006). As protein-encoding genes evolve faster, they are considered more appropriate for the phylogenetic analysis of closely related species. Within the genus *Flavobacterium*, protein-encoding genes have not yet been used for detailed phylogenetic study. The *gyrB* gene was found to be a successful marker for phylogenetic analysis in several groups in other phyla, for example *Acinetobacter* (*Proteobacteria*) (Yamamoto & Harayama, 1996) and *Microspora* (*Actinobacteria*) (Kasai *et al.*, 2000), but also in the phylum *Bacteroidetes* in the genus *Marinilabilia* and related taxa (Suzuki *et al.*, 1999). In these studies, phylogenetic analysis based on the *gyrB* gene sequences was shown to be consistent with DDH and phenotypic comparison (Yamamoto & Harayama, 1996). Suzuki *et al.* (2001) applied *gyrB* gene sequencing to study the phylogenetic relationships of marine isolates within the phylum *Bacteroidetes* and included two *Flavobacterium* species. In addition, more *gyrB* sequences from *Flavobacterium* species are becoming available in the frame of genome projects (Duchaud *et al.*, 2007).

In a previous study of aquatic and terrestrial microbial mats in Antarctica, several *Flavobacterium* strains were isolated that showed a low similarity to described *Flavobacterium* species, based on the partial or the full 16S rRNA gene sequences (Peeters *et al.*, submitted). In the present study, we determined the *gyrB* gene sequence of 33 of these new Antarctic isolates and of the type strains of related *Flavobacterium* species to study the diversity of our isolates in more detail and to elucidate the usefulness of *gyrB* as a phylogenetic marker for phylogeny in the genus *Flavobacterium*. We also compared with the phylogeny based on the near-complete 16S rRNA gene sequences.

## Materials and methods

### Strains used

The *Flavobacterium* strains studied here (Table 1) were obtained as part of a large study into the diversity of

heterotrophic bacteria in microbial mats from Antarctica (Peeters *et al.*, submitted). The samples used in that study originated from a terrestrial sample, taken in the close neighbourhood of the Princess Elisabeth Station in Utsteinen, Dronning Maud Land (Peeters *et al.*, 2011a), and microbial mat samples from lakes in the Transantarctic Mountains (Peeters *et al.*, 2011b), the Schirmacher Oasis and on Pourquoi-Pas Island (Antarctic Peninsula) (for details, see Table 1). In these previous studies, isolates were first grouped by rep-PCR fingerprinting and representatives of all rep-types were tentatively identified by full or partial 16S rRNA gene sequencing (Peeters *et al.*, 2011a; Peeters *et al.*, 2011b; Peeters *et al.*, submitted). Several of these strains were identified as *Flavobacterium* and 33 of these were used in this study (Table 1). To elucidate their phylogenetic relationships, type strains of closely related *Flavobacterium* species were also included (Table 2).

### 16S rRNA gene sequence analysis

The complete 16S rRNA gene sequences of four Antarctic *Flavobacterium* isolates were available from previous studies (Peeters *et al.*, 2011a, 2011b). The 16S rRNA genes of the remaining 29 Antarctic *Flavobacterium* isolates were only partially sequenced (400 bp) (Peeters *et al.*, submitted). These sequences were completed in this study (accession numbers listed in Table 1) using the same method as that described before (Vancanneyt *et al.*, 2004). A multiple sequence alignment of all complete 16S rRNA gene sequences was performed using the BIONUMERICS (version 5.1.) software package (Applied-Maths) and a region of 912 bp, containing good sequence data for all strains, was delimited for further analysis. After visual inspection, distances were calculated using the Kimura-2 correction. A neighbour-joining dendrogram (Saitou & Nei, 1987) was constructed and bootstrapping analysis was performed using 500 bootstrap replicates. A maximum likelihood dendrogram was calculated using the program PHYML (Guindon & Gascuel, 2003). The reliability of the tree was checked using the approximate likelihood ratio test (aLRT) method (Anisimova & Gascuel, 2006).

### *gyrB* gene sequence analysis

For *F. johnsoniae*, *F. aquatile* and *Myroides odoratus* the *gyrB* sequences were available in the EMBL database (Table 2). For the other strains used, the *gyrB* sequences were determined in this study. DNA preparation was carried out as described by Baele *et al.* (2003). Primers were designed in KODON 3.5 using all available *gyrB* sequences from *Flavobacterium* and species from closely related genera (*Bacteroides*, *Cytophaga*, *Flexibacter*, *Terrimonas*, *Porphyrobacter*, *Parabacteroides*, *Salinibacter* and *Prevotella*) in the EMBL database (September 2009). A *gyrB* segment about 1200 bp

**Table 1.** Strain numbers, accession numbers and isolation source of the Antarctic *Flavobacterium* isolates used

| Species                      | Strain no. | Accession no. |                  | Isolation source                                         |
|------------------------------|------------|---------------|------------------|----------------------------------------------------------|
|                              |            | 16S rRNA gene | <i>gyrB</i> gene |                                                          |
| <i>Flavobacterium</i> sp. 1  | R-40838    | FR682718*     | FR772324         | Terrestrial microbial mat, Utsteinen nunatak, Antarctica |
|                              | R-40949    | FR772055      | FR772296         | Terrestrial microbial mat, Utsteinen nunatak, Antarctica |
| <i>Flavobacterium</i> sp. 2  | R-36233    | FR682719*     | FR772292         | Terrestrial microbial mat, Utsteinen nunatak, Antarctica |
|                              | R-36668    | FR772052      | FR772293         | Terrestrial microbial mat, Utsteinen nunatak, Antarctica |
|                              | R-36669    | FR772053      | FR772294         | Terrestrial microbial mat, Utsteinen nunatak, Antarctica |
|                              | R-36523    | FR772054      | FR772295         | Terrestrial microbial mat, Utsteinen nunatak, Antarctica |
| <i>Flavobacterium</i> sp. 3  | R-41499    | FR772077      | FR772318         | Aquatic microbial mat, Schirmacher Oasis, Antarctica     |
| <i>Flavobacterium</i> sp. 4  | R-38377    | FR772072      | FR772313         | Aquatic microbial mat, Pourquoi-Pas Island, Antarctica   |
|                              | R-37599    | FR772073      | FR772314         | Aquatic microbial mat, Pourquoi-Pas Island, Antarctica   |
|                              | R-38423    | FR772067      | FR772308         | Aquatic microbial mat, Pourquoi-Pas Island, Antarctica   |
|                              | R-40835    | FR772071      | FR772312         | Aquatic microbial mat, Pourquoi-Pas Island, Antarctica   |
|                              | R-36964    | FR691441*     | FR772322         | Aquatic microbial mat, Forlidas Pond, Antarctica         |
|                              | R-38388    | FR772056      | FR772297         | Aquatic microbial mat, Pourquoi-Pas Island, Antarctica   |
| <i>Flavobacterium</i> sp. 5  | R-38274    | FR772058      | FR772299         | Aquatic microbial mat, Pourquoi-Pas Island, Antarctica   |
| <i>Flavobacterium</i> sp. 6  | R-38352    | FR772069      | FR772310         | Aquatic microbial mat, Pourquoi-Pas Island, Antarctica   |
|                              | R-38477    | FR772059      | FR772300         | Aquatic microbial mat, Pourquoi-Pas Island, Antarctica   |
| <i>Flavobacterium</i> sp. 7  | R-40837    | FR772060      | FR772301         | Aquatic microbial mat, Pourquoi-Pas Island, Antarctica   |
|                              | R-38313    | FR772065      | FR772306         | Aquatic microbial mat, Pourquoi-Pas Island, Antarctica   |
|                              | R-38503    | FR772061      | FR772302         | Aquatic microbial mat, Pourquoi-Pas Island, Antarctica   |
|                              | R-41504    | FR772062      | FR772303         | Aquatic microbial mat, Pourquoi-Pas Island, Antarctica   |
|                              | R-38294    | FR772063      | FR772304         | Aquatic microbial mat, Pourquoi-Pas Island, Antarctica   |
| <i>Flavobacterium</i> sp. 9  | R-38296    | FR772064      | FR772305         | Aquatic microbial mat, Pourquoi-Pas Island, Antarctica   |
|                              | R-38392    | FR772074      | FR772315         | Aquatic microbial mat, Pourquoi-Pas Island, Antarctica   |
| <i>Flavobacterium</i> sp. 11 | R-37608    | FR772076      | FR772317         | Aquatic microbial mat, Pourquoi-Pas Island, Antarctica   |
| <i>Flavobacterium</i> sp. 12 | R-38474    | FR772057      | FR772298         | Aquatic microbial mat, Pourquoi-Pas Island, Antarctica   |
|                              | R-38373    | FR772070      | FR772311         | Aquatic microbial mat, Pourquoi-Pas Island, Antarctica   |
| <i>Flavobacterium</i> sp. 13 | R-40832    | FR772078      | FR772319         | Aquatic microbial mat, Forlidas Pond, Antarctica         |
|                              | R-36976    | FR772080      | FR772323         | Aquatic microbial mat, Forlidas Pond, Antarctica         |
|                              | R-36963    | FR691440*     | FR772321         | Aquatic microbial mat, Forlidas Pond, Antarctica         |
|                              | R-36961    | FR772079      | FR772320         | Aquatic microbial mat, Forlidas Pond, Antarctica         |
|                              | R-38349    | FR772068      | FR772309         | Aquatic microbial mat, Pourquoi-Pas Island, Antarctica   |
| <i>Flavobacterium</i> sp. 14 | R-38420    | FR772066      | FR772307         | Aquatic microbial mat, Pourquoi-Pas Island, Antarctica   |
|                              | R-37612    | FR772075      | FR772316         | Aquatic microbial mat, Pourquoi-Pas Island, Antarctica   |

The 16S rRNA gene sequences marked with an asterisk were determined in previous studies (Peeters *et al.*, 2011a, 2011b).

long was obtained with the primers *gyrB*-241F (5'-GA YACCGGWCCTGGTATTCC-3') and *gyrB*-1588R (5'-TC DAYATCGGCATCACACAT-3'), which were used both for amplification and for sequencing reactions. For amplification, the reaction mix (50 µL) consisted of 5 µL GeneAmp® 10 × PCR buffer (Applied Biosystems), 5 µL dNTP's (2 mM), 0.5 µL of the forward and reverse primer (50 µM), 1 µL Taq polymerase (1 U µL<sup>-1</sup>), 33 µL MilliQ water and 5 µL template DNA. After an initial denaturation step (95 °C for 5 min), three cycles of preamplification (95 °C for 1 min, 55 °C for 2 min 15 s and 72 °C for 1 min 15 s) and 25 cycles of amplification (95 °C for 35 s, 55 °C for 1 min 15 s and 72 °C for 1 min 15 s) were performed, finishing with 72 °C for 7 min. PCR products were purified using a Nucleofast 96 PCR cleanup membrane system (Machery-Nagel, Germany) and a Tecan Workstation 200. The sequencing PCR was performed as described before (Vancanneyt *et al.*, 2004).

Sequence assembly and phylogenetic analysis was performed with the BIONUMERICS (version 5.1) software package (Applied-Maths) using a region of 1006 bp, containing good sequence data for all strains. The multiple alignment was verified by comparison with an alignment of the corresponding amino acids. After visual inspection of the sequence alignments, distances were calculated using the Kimura-2 correction. A neighbour-joining dendrogram (Saitou & Nei, 1987) was constructed and bootstrapping analysis was performed using 500 bootstrap replicates. A maximum likelihood dendrogram was calculated using the program PHYLIP (Guindon & Gascuel, 2003). The reliability of the tree was checked using the aLRT method (Anisimova & Gascuel, 2006). Accession numbers of the *gyrB* gene sequence of the *Flavobacterium* strains and the type strains of the *Flavobacterium* species are listed in Tables 1 and 2, respectively.

**Table 2.** *Flavobacterium* species included in this study

| Species                             | Strain no.              | Accession no. |                  | Isolation source                              | References                       |
|-------------------------------------|-------------------------|---------------|------------------|-----------------------------------------------|----------------------------------|
|                                     |                         | 16S rRNA gene | <i>gyrB</i> gene |                                               |                                  |
| <i>Flavobacterium antarcticum</i>   | LMG 25319 <sup>T</sup>  | FM163401      | <b>FR774016</b>  | Terrestrial sample from the Antarctic         | Yi <i>et al.</i> (2005)          |
| <i>Flavobacterium aquatile</i>      | LMG 4427 <sup>T</sup>   | AM230485      | AB034225         | Deep well, Kent, England                      | Bernardet <i>et al.</i> (1996)   |
| <i>Flavobacterium degerlachei</i>   | LMG 21915 <sup>T</sup>  | AJ557886      | <b>FR774017</b>  | Microbial mats in Antarctic lakes             | Van Trappen <i>et al.</i> (2004) |
| <i>Flavobacterium flevense</i>      | LMG 8328 <sup>T</sup>   | D12662        | <b>FR774018</b>  | Freshwater lake, the Netherlands              | Bernardet <i>et al.</i> (1996)   |
| <i>Flavobacterium frigidarium</i>   | LMG 21010 <sup>T</sup>  | AF162266      | <b>FR774019</b>  | Marine sediment, Antarctica                   | Humphry <i>et al.</i> (2001)     |
| <i>Flavobacterium frigoris</i>      | LMG 21922 <sup>T</sup>  | AJ557887      | <b>FR850657</b>  | Microbial mats in Antarctic lakes             | Van Trappen <i>et al.</i> (2004) |
| <i>Flavobacterium fryxellicola</i>  | LMG 22022 <sup>T</sup>  | AJ811961      | <b>FR774020</b>  | Microbial mats in Antarctic lakes             | Van Trappen <i>et al.</i> (2005) |
| <i>Flavobacterium gelidilacus</i>   | LMG 21477 <sup>T</sup>  | AJ440996      | <b>FR774021</b>  | Microbial mats in Antarctic lakes             | Van Trappen <i>et al.</i> (2003) |
| <i>Flavobacterium gillisiae</i>     | LMG 21422 <sup>T</sup>  | U85889        | <b>FR774014</b>  | Antarctic coastal sea ice                     | McCammon & Bowman (2000)         |
| <i>Flavobacterium glaciei</i>       | LMG 25320 <sup>T</sup>  | DQ515962      | <b>FR774022</b>  | China No.1 glacier                            | Zhang <i>et al.</i> (2006)       |
| <i>Flavobacterium hibernum</i>      | LMG 21424 <sup>T</sup>  | L39067        | <b>FR774023</b>  | Freshwater Antarctic lake                     | McCammon <i>et al.</i> (1998)    |
| <i>Flavobacterium johnsoniae</i>    | LMG 1340 <sup>T</sup>   | AM230489      | AB034222         | Soil or mud, Rothamsted or Cambridge, England | Bernardet <i>et al.</i> (1996)   |
| <i>Flavobacterium limicola</i>      | LMG 21930 <sup>T</sup>  | AB075230      | <b>FR774015</b>  | Freshwater sediments                          | Tamaki <i>et al.</i> (2003)      |
| <i>Flavobacterium micromati</i>     | LMG 21919 <sup>T</sup>  | AJ557888      | <b>FR774024</b>  | Microbial mats in Antarctic lakes             | Van Trappen <i>et al.</i> (2004) |
| <i>Flavobacterium omnivorum</i>     | LMG 21986 <sup>T</sup>  | AF433174      | <b>FR774025</b>  | China No. 1 glacier                           | Zhu <i>et al.</i> (2003)         |
| <i>Flavobacterium psychrolimnae</i> | LMG 22018 <sup>T</sup>  | AJ585428      | <b>FR774026</b>  | Microbial mats in Antarctic lakes             | Van Trappen <i>et al.</i> (2005) |
| <i>Flavobacterium psychrophilum</i> | LMG 13179 <sup>T</sup>  | AB078060      | <b>FR774027</b>  | Kidney of salmon                              | Bernardet <i>et al.</i> (1996)   |
| <i>Flavobacterium reichenbachii</i> | LMG 25512 <sup>T</sup>  | AM177616      | <b>FR774028</b>  | Hard water rivulet, Germany                   | Ali <i>et al.</i> (2009)         |
| <i>Flavobacterium succinicans</i>   | LMG 10402 <sup>T</sup>  | AM230492      | <b>FR774029</b>  | Eroded fin of salmon, Washington              | Bernardet <i>et al.</i> (1996)   |
| <i>Flavobacterium swingsii</i>      | LMG 25510 <sup>T</sup>  | AM934651      | <b>FR774030</b>  | Hard water rivulet, Germany                   | Ali <i>et al.</i> (2009)         |
| <i>Flavobacterium tegetincola</i>   | LMG 21423 <sup>T</sup>  | U85887        | <b>FR774031</b>  | Antarctic cyanobacterial mat                  | McCammon & Bowman (2000)         |
| <i>Flavobacterium xanthum</i>       | LMG 8372 <sup>T</sup>   | AF030380      | <b>FR774032</b>  | Pool mud, Syowa, Antarctica                   | McCammon & Bowman (2000)         |
| <i>Flavobacterium xinjiangense</i>  | LMG 21985 <sup>T</sup>  | AF433173      | <b>FR774033</b>  | China No. 1 glacier                           | Zhu <i>et al.</i> (2003)         |
| <i>Myroides odoratus</i>            | NBRC 14945 <sup>T</sup> | M58777        | AB034239         | Urine and serum specimen                      | Vancanneyt <i>et al.</i> (1996)  |

Accession numbers for newly determined sequences are shown in bold.

## Results and discussion

This study was carried out to resolve the relationships of 33 Antarctic *Flavobacterium* strains that were previously characterized by partial 16S rRNA gene sequencing and found to represent several potentially novel groups. We completed the 16S rRNA gene sequences for all the strains and performed a phylogenetic analysis including also the type strains of 23 related or Antarctic *Flavobacterium* species. Neighbour-joining and maximum likelihood trees (Fig. 1 and Supporting Information, Fig. S1) showed a similar topology with the *Flavobacterium* isolates forming 15 groups, labelled *Flavobacterium* sp. 1–15. *Flavobacterium* sp. 13 and *Flavobacterium* sp. 5 were located close to, respectively, *F. micromati* and *F. gelidilacus*, with 99.8% and 99.0% sequence similarity to the respective type strain. It is well known that because of its high conservation, the 16S rRNA gene sequence has limited resolving power at the species level (Rossello-Mora & Amann, 2001). Indeed, there are examples of distinct species with identical or nearly identical 16S rRNA gene sequences (Fox *et al.*, 1992; Probst *et al.*, 1998), microheterogeneity of

the 16S rRNA genes within one species (Bennasar *et al.*, 1996) or single organisms with two or more 16S rRNA genes with a relatively high sequence divergence (Nübel *et al.*, 1996). In the genus *Flavobacterium*, several new species have been described with a rather high 16S rRNA gene sequence similarity, for example the type strains of *Flavobacterium weaverense* and *Flavobacterium segetis* share 98.9% 16S rRNA gene sequence similarity, and yet, they have a DDH value of only 34% (Yi & Chun, 2006). Because protein-encoding genes are generally less conserved (Ochman & Wilson, 1987), they may be more appropriate for phylogenetic analysis of closely related species. Several protein-encoding genes such as *glnA*, *recA* and *hsp60* have been used for typing and taxonomical purposes within genera in the *Bacteroidetes* (Gutacker *et al.*, 2002; Sakamoto *et al.*, 2010). In this study, the *gyrB* gene, encoding for the B subunit of the DNA gyrase, was selected because it was previously used successfully to distinguish between closely related taxa affiliated with the genus *Flavobacterium* (Suzuki *et al.*, 1999, 2001). Izumi *et al.* (2003) reported on the use of *gyrB* primers in a PCR-restriction fragment length

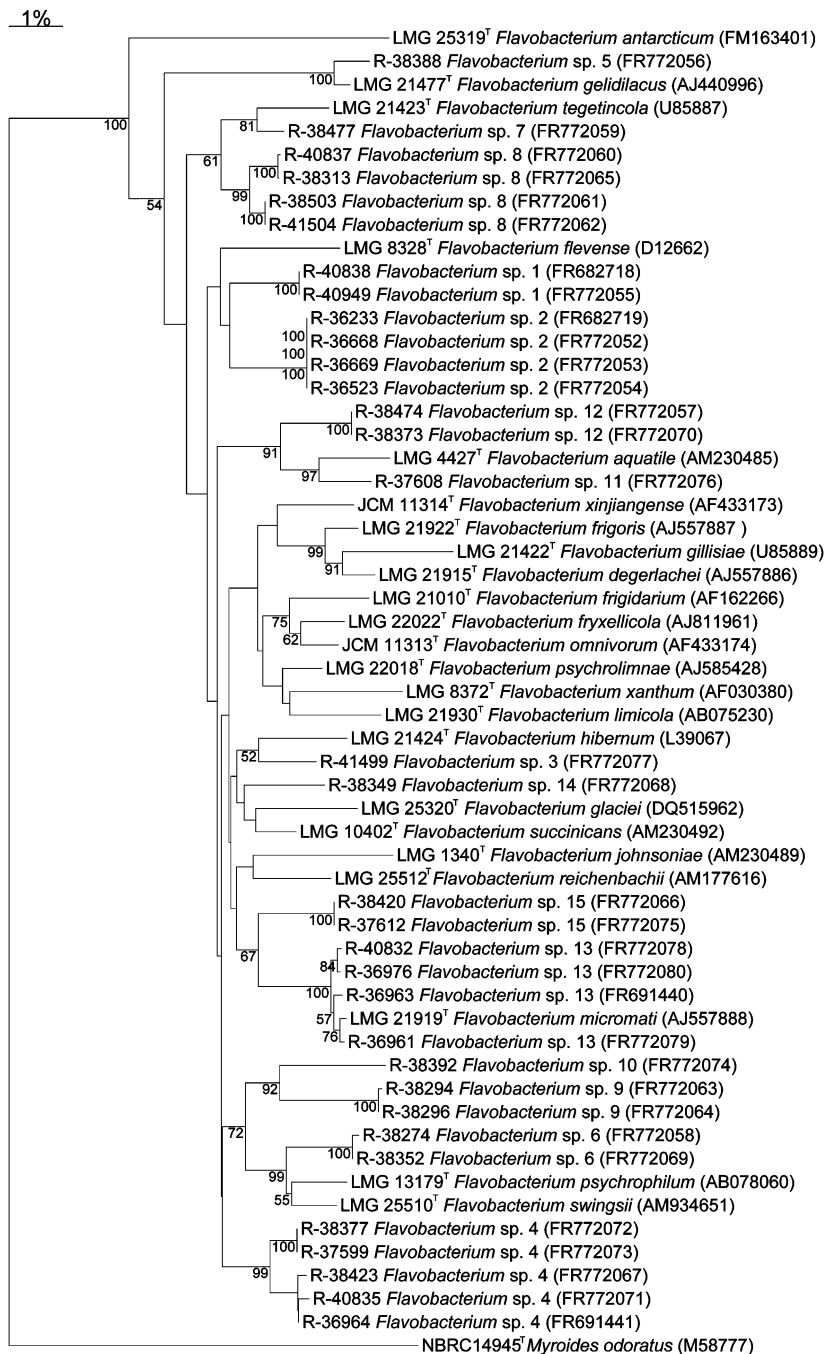

**Fig. 1.** Phylogenetic tree based on neighbour-joining analysis of the 16S rRNA gene sequence similarities of the *Flavobacterium* strains and closely related species. New *Flavobacterium* isolates are marked as *Flavobacterium* sp., followed by a number. The numbers at branch nodes are bootstrap values shown as percentages of 500 bootstrap replicates (only values > 50% are shown). Scale bar represents 1% estimated substitutions.

polymorphism analysis for the genotyping of *F. psychrophilum*, and Suzuki *et al.* (1999) designed *gyrB* primers to study the phylogenetic relationship for the genus *Marinilabilia* (*Bacteroidetes*) and related taxa. We tested all primers reported in these studies *in silico* on the *gyrB* sequences available from related genera and from the complete genome of *F. johnsoniae* DSM 2064 and found considerable mismatches with all groups included in the comparison.

Therefore, more general primers were designed based on the available sequence information.

As expected for a more variable housekeeping gene, the distance between the *Flavobacterium* groups and the type strains is significantly higher in the *gyrB* gene dendrogram (Figs 2 and S2) in comparison with the 16S rRNA gene dendrogram (Figs 1, S1 and Table 3). The threshold for species definition has been suggested to be 98.7–99.0% 16S

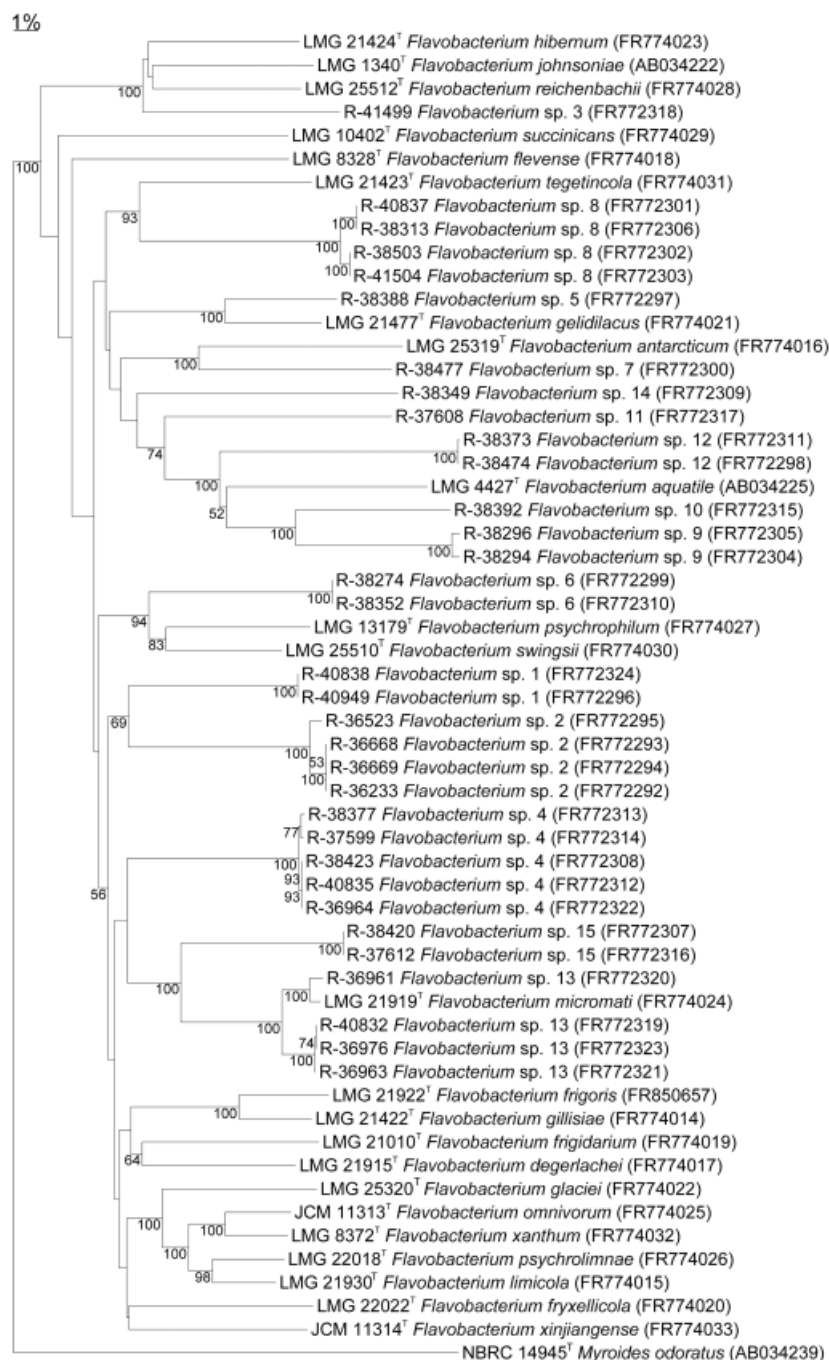

**Fig. 2.** Phylogenetic tree based on neighbour-joining analysis of the *gyrB* gene sequence similarities of the *Flavobacterium* strains and closely related species. New *Flavobacterium* isolates are marked as *Flavobacterium* sp., followed by a number. The numbers at branch nodes are bootstrap values shown as percentages of 500 bootstrap replicates (only values > 50% are shown). Scale bar represents 1% estimated substitutions.

rRNA gene sequence similarity by Stackebrandt & Ebers (2006), whereas for the *gyrB* phylogeny, this is less well documented. Suzuki *et al.* (2001) reported that the proposed limit for species identity, the 70% DNA reassociation value, corresponds to 88.8% *gyrB* sequence similarity in the subset of the *Bacteroidetes* they studied, whereas several other studies revealed a wide range of interspecies similarity values [60.0–89.0% *gyrB* gene sequence similarity within the genus

*Helicobacter* (*Epsilonproteobacteria*) (Hannula & Hanninen, 2007), 75.4–95.0% within the genus *Bacillus* (*Firmicutes*) (Wang *et al.*, 2007), 85.0–97.5% within the genus *Aeromonas* (*Gammaproteobacteria*) (Yanez *et al.*, 2003), 77.5–97.6% within the genus *Gordonia* (*Actinobacteria*) (Kang *et al.*, 2009), 89.5–98.2% within the genus *Kribbella* (*Actinobacteria*) (Kirby *et al.*, 2010) and 70.1–98.7% within the genus *Streptococcus* (*Firmicutes*) (Itoh *et al.*, 2006)]. Among the

**Table 3.** Within-group similarity, closest related species and corresponding sequence similarity for the different Antarctic *Flavobacterium* groups based on the 16S rRNA and the *gyrB* gene phylogeny

| 16S rRNA gene                |                             | <i>gyrB</i> gene                                      |                |
|------------------------------|-----------------------------|-------------------------------------------------------|----------------|
| Antarctic species            | Within group similarity (%) | Nearest neighbour                                     | Similarity (%) |
| <i>Flavobacterium</i> sp. 1  | 100                         | <i>Flavobacterium limicola</i>                        | 86.1           |
| <i>Flavobacterium</i> sp. 2  | 100                         | LMG 21930 <sup>T</sup>                                | 86.6–86.4      |
| <i>Flavobacterium</i> sp. 3  | 99.5–99.2                   | LMG 22018 <sup>T</sup>                                | 87.2           |
| <i>Flavobacterium</i> sp. 4  | 99.5–99.2                   | <i>Flavobacterium hibernum</i>                        | 86.9–86.7      |
| <i>Flavobacterium</i> sp. 5  | 99.9                        | LMG 21424 <sup>T</sup>                                | 91.9           |
| <i>Flavobacterium</i> sp. 6  | 99.9                        | <i>Flavobacterium degerlachei</i>                     | 88.6           |
| <i>Flavobacterium</i> sp. 7  | 99.1–100                    | LMG 21915 <sup>T</sup>                                | 85.5           |
| <i>Flavobacterium</i> sp. 8  | 99.1–100                    | <i>Flavobacterium gelidilacus</i>                     | 85.8–85.7      |
| <i>Flavobacterium</i> sp. 9  | 99.9                        | LMG 21477 <sup>T</sup>                                | 84.6           |
| <i>Flavobacterium</i> sp. 10 | 99.9                        | <i>Flavobacterium swingsii</i> LMG 25510 <sup>T</sup> | 84.2           |
| <i>Flavobacterium</i> sp. 11 | 100                         | <i>Flavobacterium antarcticum</i>                     | 82.9           |
| <i>Flavobacterium</i> sp. 12 | 100                         | LMG 25319 <sup>T</sup>                                | 84.1–83.7      |
| <i>Flavobacterium</i> sp. 13 | 99.6–99.4                   | <i>Flavobacterium tegetincola</i>                     | 99.0–96.9      |
| <i>Flavobacterium</i> sp. 14 | 100                         | LMG 21423 <sup>T</sup>                                | 99.4           |
| <i>Flavobacterium</i> sp. 15 | 100                         | <i>Flavobacterium aquatile</i> LMG 4008 <sup>T</sup>  | 84.6           |
|                              |                             | LMG 4427 <sup>T</sup>                                 | 84.2           |
|                              |                             | <i>Flavobacterium swingsii</i> LMG 25510 <sup>T</sup> | 82.9           |
|                              |                             | <i>Flavobacterium aquatile</i> LMG 4008 <sup>T</sup>  | 84.1–83.7      |
|                              |                             | <i>Flavobacterium aquatile</i> LMG 4008 <sup>T</sup>  | 99.0–96.9      |
|                              |                             | <i>Flavobacterium micromati</i>                       | 99.0–96.9      |
|                              |                             | LMG 21919 <sup>T</sup>                                | 99.0–96.9      |
|                              |                             | <i>Flavobacterium swingsii</i> LMG 25510 <sup>T</sup> | 84.1           |
|                              |                             | <i>Flavobacterium micromati</i>                       | 88.5           |
|                              |                             | LMG 21919 <sup>T</sup>                                | 88.5           |

Antarctic *Flavobacterium* groups for which no within-group similarity is listed consist of one strain.

type strains of the *Flavobacterium* species investigated in this study, the interspecies *gyrB* sequence similarity values varied from 79.1% between *F. aquatile* and *Flavobacterium reichbachii* to 94.9% between *F. xanthum* and *F. omnivorum*.

The phylogenetic trees based on the *gyrB* sequences (Figs 2 and S2) show that the groups found in the 16S rRNA gene dendrogram (Figs 1 and S1) were confirmed. The Antarctic *Flavobacterium* groups generally showed lower *gyrB* gene sequence similarity to neighbouring groups and species, which confirmed their status as potentially new species. *Flavobacterium* sp. 13 and sp. 5, which, in the 16S rRNA gene phylogeny, were closely related to *F. micromati* and *F. gelidilacus*, respectively, also group with these species in the *gyrB* phylogeny. Both groupings are well supported; however, the *gyrB* similarity of *Flavobacterium* sp. 13 to *F. micromati* LMG 21919 (97.0%) is higher than that of *Flavobacterium* sp. 5 to *F. gelidilacus* LMG 21477 (91.9%). *Flavobacterium* sp. 13 probably belongs to *F. micromati* that was originally isolated from microbial mats in Antarctic lakes (Van Trappen *et al.*, 2004) as were the isolates of *Flavobacterium* sp. 13 (Table 1). *Flavobacterium* sp. 5 probably represents a new species in view of the rather low *gyrB* gene sequence similarity to *F. gelidilacus* in comparison with the higher similarity values obtained between some type strains. Nevertheless, the precise relation to *F. gelidilacus*, another species from Antarctic microbial mats (Van Trappen *et al.*, 2003), remains to be investigated further.

The similarities within the delineated *Flavobacterium* groups are generally very high for the 16S rRNA gene sequences (Table 3). The *gyrB* sequences were mostly also very similar within groups and ranged from 97.2% to 100% (Table 3). In *Flavobacterium* sp. 2, sp. 8 and sp. 13 (Figs 2 and S2) subclusters were observed with 97.2–99.0% sequence similarity. In other genera, comparable high intraspecies *gyrB* gene sequence similarities were observed, for example 98.5–100% *gyrB* gene sequence similarity within the genus *Streptomyces* (*Actinobacteria*) (Hatano *et al.*, 2003), 97.4–100% within the genus *Aeromonas* (*Gamma-proteobacteria*) (Yanez *et al.*, 2003), 95.0–100% within the genus *Bacillus* (*Firmicutes*) (Wang *et al.*, 2007) and 94.6–100% within the genus *Helicobacter* (*Epsilonproteobacteria*) (Hannula & Hanninen, 2007).

It should be noted that all *Flavobacterium* groups studied here comprised several rep-types (Peeters *et al.*, submitted) and the strains were chosen to represent this diversity. The topologies of the neighbour-joining and the maximum likelihood dendrogram were slightly different for the 16S rRNA gene compared with the *gyrB* gene (Figs 1, 2, S1 and S2), as has also been observed for other groups (Yamamoto & Harayama, 1996). However, overall, the phylogenies of the 16S rRNA (Figs 1 and S1) and *gyrB* (Figs 2 and S2) gene were similar and confirmed the division of the Antarctic strains into 15 groups, one probably belonging to *F. micromati* and

one close to *F. gelidilacus*. The other 13 *Flavobacterium* groups formed separate groups in both the 16S rRNA gene and the *gyrB* gene phylogeny and probably represent new species. However, additional characterization is necessary to confirm this and to describe them as new species.

In conclusion, this study showed that within the genus *Flavobacterium*, the *gyrB* gene has a higher discriminatory power than the 16S rRNA gene. In comparison with the 16S rRNA gene sequence, the sequence similarities for the *gyrB* gene between the delineated groups are significantly lower whereas within the different groups they are still very high. Although there are differences in topology in the dendrograms based on either gene, the same groups of Antarctic *Flavobacterium* strains were recovered. Thus, the *gyrB* gene is a promising molecular marker to elucidate the phylogenetic relationships among *Flavobacterium* species and should be evaluated for all the other *Flavobacterium* species described. The phylogeny of both the 16S rRNA gene and the *gyrB* gene showed that the Antarctic *Flavobacterium* isolates studied here represent at least 13 potentially new species. These will be studied in more detail using various methods to confirm this and describe these groups appropriately.

## Acknowledgements

This work was funded by the Belgian Science Policy Office (BelSPO) projects AMBIO and BELDIVA. These projects contribute to IPY research proposal no. 55 MERGE (Microbiological and Ecological Responses to Global Environmental Changes in Polar Regions) and the SCAR 'Evolution and Biodiversity in Antarctica' programme. We thank the project coordinators Annick Wilmotte, Wim Vyverman and Elie Verleyen and the Antarctic programme coordinator Maaïke Van Cauwenberghe from BelSPO for administrative and logistic support during expeditions.

## References

- Aislabie JM, Broady PA & Saul DJ (2006) Culturable aerobic heterotrophic bacteria from high altitude, high latitude soil of La Gorce Mountains (86°30'S, 147°W), Antarctica. *Antarct Sci* **18**: 313–321.
- Ali Z, Cousin S, Frühling A, Brambilla E, Schumann P, Yang Y & Stackebrandt E (2009) *Flavobacterium rivuli* sp. nov., *Flavobacterium subsaxonicum* sp. nov., *Flavobacterium swingsii* sp. nov. and *Flavobacterium reichenbachii* sp. nov., isolated from a hard water rivulet. *Int J Syst Evol Micro* **59**: 2610–2617.
- Anisimova M & Gascuel O (2006) Approximate likelihood-ratio test for branches: a fast, accurate, and powerful alternative. *Syst Biol* **55**: 539–552.
- Babalola OO, Kirby BM, Le Roes-Hill M, Cook AE, Cary SC, Burton SG & Cowan DA (2009) Phylogenetic analysis of



- actinobacterial populations associated with Antarctic Dry Valley mineral soils. *Environ Microbiol* **11**: 566–576.
- Baele M, Vancanneyt M, Devriese LA, Lefebvre K, Swings J & Haesebrouck F (2003) *Lactobacillus ingluviei* sp. nov., isolated from the intestinal tract of pigeons. *Int J Syst Evol Micr* **53**: 133–136.
- Bauwens M & De Ley J (1981) Improvements in the taxonomy of *Flavobacterium* by DNA:rRNA hybridizations. *The Flavobacterium–Cytophaga Group. GBF Monograph Series No. 5* (Reichenbach H & Weeks O, eds), pp. 27–31. Verlag Chemie, Weinheim, Germany.
- Bennasar A, Rossello-Mora R, Lalucat J & Moore ERB (1996) 16S rRNA gene sequence analysis relative to genomovars of *Pseudomonas stutzeri* and proposal of *Pseudomonas balearica* sp. nov. *Int J Syst Bacteriol* **46**: 200–205.
- Bergey DH, Harrison FC, Breed RS, Hammer BW & Huntoon FM (1923) *Bergey's Manual of Determinative Bacteriology*. The Williams and Wilkins Co., Baltimore.
- Bernardet J-F & Bowman JP (2006) The genus *Flavobacterium*. *Prokaryotes* **7**: 481–531.
- Bernardet JF, Segers P, Vancanneyt M, Berthe F, Kersters K & Vandamme P (1996) Cutting a gordian knot: emended classification and description of the genus *Flavobacterium*, emended description of the family *Flavobacteriaceae*, and proposal of *Flavobacterium hydatis* nom. nov. (basonym, *Cytophaga aquatilis* Strohl and Tait 1978). *Int J Syst Bacteriol* **46**: 128–148.
- Bernardet JF, Nakagawa Y & Holmes B & Subcommittee on the Taxonomy of *Flavobacterium* and *Cytophaga*-like bacteria of the International Committee on Systematics of Prokaryotes (2002) Proposed minimal standards for describing new taxa of the family *Flavobacteriaceae* and emended description of the family. *Int J Syst Evol Micr* **52**: 1049–1070.
- Bowman JP, McCammon SA, Rea SM & McMeekin TA (2000) The microbial composition of three limnologically disparate hypersaline Antarctic lakes. *FEMS Microbiol Lett* **183**: 81–88.
- Brambilla E, Hippe H, Hagelstein A, Tindall BJ & Stackebrandt E (2001) 16S rDNA diversity of cultured and uncultured prokaryotes of a mat sample from Lake Fryxell, McMurdo Dry Valleys, Antarctica. *Extremophiles* **5**: 23–33.
- Duchaud E, Boussaha M, Loux V *et al.* (2007) Complete genome sequence of the fish pathogen *Flavobacterium psychrophilum*. *Nat Biotechnol* **25**: 763–769.
- Fox GE, Wisotzkey JD & Jurtschuk P (1992) How close is close – 16S rRNA sequence identity may not be sufficient to guarantee species identity. *Int J Syst Bacteriol* **42**: 166–170.
- Ghera R & Woese CR (1992) A partial phylogenetic analysis of the 'Flavobacter–Bacteroides' phylum: basis for taxonomic restructuring. *Syst Appl Microbiol* **13**: 513–521.
- Guindon S & Gascuel O (2003) A simple, fast, and accurate algorithm to estimate large phylogenies by maximum likelihood. *Syst Biol* **52**: 696–704.
- Gutacker M, Valsangiacomo C, Bernasconi MV & Piffaretti J-C (2002) *recA* and *glnA* sequences separate the *Bacteroides fragilis* population into two genetic divisions associated with the antibiotic resistance genotypes *cepA* and *cfiA*. *J Med Microbiol* **51**: 123–130.
- Hannula M & Hanninen ML (2007) Phylogenetic analysis of *Helicobacter* species based on partial *gyrB* gene sequences. *Int J Syst Evol Micr* **57**: 444–449.
- Hatano K, Nishii T & Kasai H (2003) Taxonomic re-evaluation of whorl-forming *Streptomyces* (formerly *Streptoverticillium*) species by using phenotypes, DNA–DNA hybridization and sequences of *gyrB*, and proposal of *Streptomyces luteireticuli* (ex Katoh and Arai 1957) corrig., sp. nov., nom. rev. *Int J Syst Evol Micr* **53**: 1519–1529.
- Holmes B, Owen RJ & McMeekin TA (1984) Genus *Flavobacterium* Bergey, Harrison, Breed, Hammer and Huntoon 1923, 97AL. *Bergey's Manual of Systematic Bacteriology, Vol. 1* (Krieg NR & Holt JG, eds), pp. 353–361. The Williams and Wilkins Co., Baltimore.
- Humphry DR, George A, Black GW & Cummings SP (2001) *Flavobacterium frigidarium* sp. nov., an aerobic, psychrophilic, xylanolytic and laminarinolytic bacterium from Antarctica. *Int J Syst Evol Micr* **51**: 1235–1243.
- Itoh Y, Kawamura Y, Kasai H *et al.* (2006) *dnaJ* and *gyrB* gene sequence relationship among species and strains of genus *Streptococcus*. *Syst Appl Microbiol* **29**: 368–374.
- Izumi S, Aranishi F & Wakabayashi H (2003) Genotyping of *Flavobacterium psychrophilum* using PCR–RFLP analysis. *Dis Aquat Organ* **56**: 207–214.
- Kang Y, Takeda K, Yazawa K & Mikami Y (2009) Phylogenetic studies of *Gordonia* species based on *gyrB* and *secA1* gene analyses. *Mycopathologia* **167**: 95–105.
- Kasai H, Tamura T & Harayama S (2000) Intrageneric relationships among *Micromonospora* species deduced from *gyrB*-based phylogeny and DNA relatedness. *Int J Syst Evol Micr* **50**: 127–134.
- Kirby BM, Everest GJ & Meyers PR (2010) Phylogenetic analysis of the genus *Kribbella* based on the *gyrB* gene: proposal of a *gyrB*-sequence threshold for species delineation in the genus *Kribbella*. *Antonie van Leeuwenhoek* **97**: 131–142.
- McCammon SA & Bowman JP (2000) Taxonomy of Antarctic *Flavobacterium* species: description of *Flavobacterium gillisiae* sp. nov., *Flavobacterium tegetincola* sp. nov. and *Flavobacterium xanthum* sp. nov., nom. rev. and reclassification of *Flavobacterium salegens* as *Salegentibacter salegens* gen. nov., comb. nov. *Int J Syst Evol Micr* **50**: 1055–1063.
- McCammon SA, Innes BH, Bowman JP *et al.* (1998) *Flavobacterium hibernum* sp. nov., a lactose-utilizing bacterium from a freshwater Antarctic lake. *Int J Syst Bacteriol* **48**: 1405–1412.
- Nübel U, Engelen B, Felske A *et al.* (1996) Sequence heterogeneities of genes encoding 16S rRNAs in *Paenibacillus polymyxa* detected by temperature gradient gel electrophoresis. *J Bacteriol* **178**: 5636–5643.
- Ochman H & Wilson AC (1987) Evolution in bacteria: evidence for a universal substitution rate in cellular genomes. *J Mol Evol* **26**: 74–86.

- Paster BJ, Ludwig W, Weishurg WG *et al.* (1985) A phylogenetic grouping of the *Bacteroides*, *Cytophaga*, and certain *Flavobacteria*. *Syst Appl Microbiol* **6**: 34–42.
- Peeters K, Ertz D & Willems A (2011a) Culturable bacterial diversity at the Princess Elisabeth Station (Utsteinen, Sør Rondane Mountains, East Antarctica) harbours many new taxa. *Syst Appl Microbiol* **34**: 360–367.
- Peeters K, Hodgson DA, Convey P & Willems A (2011b) Culturable diversity of heterotrophic bacteria in Forlidas Pond (Pensacola Mountains) and Lundström Lake (Shackleton Range), Antarctica. *Microb Ecol* DOI: 10.1007/s00248-00011-09842-00247.
- Peeters K, Verleyen E, Hodgson DA, Convey P, Ertz D, Vyverman W & Willems A (submitted) Heterotrophic bacterial diversity in aquatic microbial mat communities from Antarctica. *Polar Biology*.
- Probst AJ, Hertel C, Richter L, Wassill L, Ludwig W & Hammes WP (1998) *Staphylococcus condimentii* sp. nov., from soy sauce mash, and *Staphylococcus carnosus* (Schleifer and Fischer 1982) subsp. *utilis* subsp. nov. *Int J Syst Bacteriol* **48**: 651–658.
- Reichenbach H (1989) Order I. *Cytophagales* Leadbetter 1974. *Bergey's Manual of Systematic Bacteriology*, Vol. 3 (Staley JT, Bryant MP, Pfennig N & Holt JG, ed), pp. 2011–2013. The Williams and Wilkins Co., Baltimore.
- Rossello-Mora R & Amann R (2001) The species concept for prokaryotes. *FEMS Microbiol Rev* **25**: 39–67.
- Saitou N & Nei M (1987) The neighbor joining method – a new method for reconstructing phylogenetic trees. *Mol Biol Evol* **4**: 406–425.
- Sakamoto M, Suzuki N & Benno Y (2010) *hsp60* and 16S rRNA gene sequence relationships among species of the genus *Bacteroides* with the finding that *Bacteroides suis* and *Bacteroides tectus* are heterotypic synonyms of *Bacteroides pyogenes*. *Int J Syst Evol Micr* **60**: 2984–2990.
- Segers P, Vandamme P, Steyn PL, *et al.* (1993) Phylogenetic studies of *Flavobacterium* and related organisms by DNA–rRNA hybridizations. *Advances in the Taxonomy and Significance of Flavobacterium, Cytophaga and Related Bacteria* (Jooste PJ, ed), pp. 129–136. University of the Orange Free State Press, Bloemfontein, South Africa.
- Stackebrandt E & Ebers J (2006) Taxonomic parameters revisited: tarnished gold standards. *Microbiol Today* **33**: 153–155.
- Stackebrandt E, Frederiksen W, Garrity GM *et al.* (2002) Report of the *ad hoc* committee for the re-evaluation of the species definition in bacteriology. *Int J Syst Evol Micr* **52**: 1043–1047.
- Suzuki M, Nakagawa Y, Harayama S & Yamamoto S (1999) Phylogenetic analysis of genus *Marinilabilia* and related bacteria based on the amino acid sequences of *GyrB* and emended description of *Marinilabilia salmonicolor* with *Marinilabilia agarovorans* as its subjective synonym. *Int J Syst Bacteriol* **49**: 1551–1557.
- Suzuki M, Nakagawa Y, Harayama S & Yamamoto S (2001) Phylogenetic analysis and taxonomic study of marine *Cytophaga*-like bacteria: proposal for *Tenacibaculum* gen. nov. with *Tenacibaculum maritimum* comb. nov. and *Tenacibaculum ovolyticum* comb. nov., and description of *Tenacibaculum mesophilum* sp. nov. and *Tenacibaculum amylolyticum* sp. nov. *Int J Syst Evol Micr* **51**: 1639–1652.
- Tamaki H, Hanada S, Kamagata Y, Nakamura K, Nomura N, Nakano K & Matsumura M (2003) *Flavobacterium limicola* sp. nov., a psychrophilic, organic-polymer-degrading bacterium isolated from freshwater sediments. *Int J Syst Evol Micr* **53**: 519–526.
- Vancanneyt M, Segers P, Torck U, Hoste B, Bernardet JF, Vandamme P & Kersters K (1996) Reclassification of *Flavobacterium odoratum* (Stutzer 1929) strains to a new genus, *Myroides*, as *Myroides odoratus* comb. nov. and *Myroides odoratimimus* sp. nov. *Int J Syst Bacteriol* **46**: 926–932.
- Vancanneyt M, Mengaud J, Cleenwerck I, Vanhonacker K, Hoste B, Dawyndt P *et al.* (2004) Reclassification of *Lactobacillus kefirgranum* Takizawa *et al.* 1994 as *Lactobacillus kefirgranofaciens* subsp. *kefirgranum* subsp. nov. and emended description of *L. kefirgranofaciens* Fujisawa *et al.* 1988. *Int J Syst Evol Micr* **54**: 551–556.
- Vandamme P, Bernardet JF, Segers P, Kersters K & Holmes B (1994) New perspectives in the classification of the *Flavobacteria* – description of *Chryseobacterium* gen. nov., *Bergeyella* gen. nov. and *Empedobacter* nom. rev. *Int J Syst Evol Micr* **44**: 827–831.
- Van Trappen S, Mergaert J, Van Eygen S, Dawyndt P, Cnockaert MC & Swings J (2002) Diversity of 746 heterotrophic bacteria isolated from microbial mats from ten Antarctic lakes. *Syst Appl Microbiol* **25**: 603–610.
- Van Trappen S, Mergaert J & Swings J (2003) *Flavobacterium gelidilacus* sp. nov., isolated from microbial mats in Antarctic lakes. *Int J Syst Evol Micr* **53**: 1241–1245.
- Van Trappen S, Vandecandelaere I, Mergaert J & Swings J (2004) *Flavobacterium degerlachei* sp. nov., *Flavobacterium frigoris* sp. nov. and *Flavobacterium micromati* sp. nov., novel psychrophilic bacteria isolated from microbial mats in Antarctic lakes. *Int J Syst Evol Micr* **54**: 85–92.
- Van Trappen S, Vandecandelaere I, Mergaert J & Swings J (2005) *Flavobacterium fryxellicola* sp. nov. and *Flavobacterium psychrolimnae* sp. nov., novel psychrophilic bacteria isolated from microbial mats in Antarctic lakes. *Int J Syst Evol Micr* **55**: 769–772.
- Wang L-T, Lee F-L, Tai C-J & Kasai H (2007) Comparison of *gyrB* gene sequences, 16S rRNA gene sequences and DNA–DNA hybridization in the *Bacillus subtilis* group. *Int J Syst Evol Micr* **57**: 1846–1850.
- Woese CR, Yang D, Mandelco L & Stetter KO (1990) The *Flexibacter*–*Flavobacter* connection. *Syst Appl Microbiol* **13**: 161–165.
- Yamamoto S & Harayama S (1996) Phylogenetic analysis of *Acinetobacter* strains based on the nucleotide sequences of *gyrB* genes and on the amino acid sequences of their products. *Int J Syst Bacteriol* **46**: 506–511.

- Yanez MA, Catalan V, Apraiz D, Figueras MJ & Martinez-Murcia AJ (2003) Phylogenetic analysis of members of the genus *Aeromonas* based on *gyrB* gene sequences. *Int J Syst Evol Microbiol* **53**: 875–883.
- Yi H, Oh HM, Lee JH, Kim SJ & Chun J (2005) *Flavobacterium antarcticum* sp. nov., a novel psychrotolerant bacterium isolated from the Antarctic. *Int J Syst Evol Microbiol* **55**: 637–641.
- Yi HN & Chun J (2006) *Flavobacterium weaverense* sp. nov. and *Flavobacterium segetis* sp. nov., novel psychrophiles isolated from the Antarctic. *Int J Syst Evol Microbiol* **56**: 1239–1244.
- Zhang DC, Wang HX, Liu HC, Dong XZ & Zhou PJ (2006) *Flavobacterium glaciei* sp. nov., a novel psychrophilic bacterium isolated from the China No.1 glacier. *Int J Syst Evol Microbiol* **56**: 2921–2925.
- Zhu F, Wang S & Zhou P (2003) *Flavobacterium xinjiangense* sp. nov. and *Flavobacterium omnivorum* sp. nov., novel psychrophiles from the China No. 1 glacier. *Int J Syst Evol Microbiol* **53**: 853–857.

## Supporting Information

Additional Supporting Information may be found in the online version of this article:

**Fig. S1.** Phylogenetic tree calculated using the maximum likelihood method based on the 16S rRNA gene sequences of the *Flavobacterium* strains and closely related species.

**Fig. S2.** Phylogenetic tree calculated using the maximum likelihood method based on the *gyrB* gene sequences of the *Flavobacterium* strains and closely related species.

Please note: Wiley-Blackwell is not responsible for the content or functionality of any supporting materials supplied by the authors. Any queries (other than missing material) should be directed to the corresponding author for the article.
